# Supplementary material
Source: PubMed Central journal article supplement (PMC2725410)
Supplement: NIHMS91881-supplement-2.pdf [file NIHMS91881-supplement-2.pdf]

## Incorporation of a QM/MM Buffer Zone in the Variational Double Self-Consistent Field Method

Wangshen Xie, Lingchun Song, Donald G. Truhlar\* and Jiali Gao\*

*Department of Chemistry and Supercomputing Institute*

*University of Minnesota, Minneapolis MN 55455*

Cartesian coordinates obtained from the X-Pol optimizations (Table S1) and from full AM1 optimizations (Table S2) are given in CHARMM format for all compounds described in this paper.

Table S1. Cartesian coordinates optimized using the X-Pol potential with AM1 model for all compounds described in the main paper. Coordinates are given in angstroms in CHARMM format.

|                 |   |      |     |          |           |          |         |         |
|-----------------|---|------|-----|----------|-----------|----------|---------|---------|
| water dimer     |   |      |     |          |           |          |         |         |
| 1               | 1 | WATE | OH2 | -6.33964 | 2.04925   | 0.85798  | WATE 40 | 0.00000 |
| 2               | 1 | WATE | H1  | -7.06441 | 2.30632   | 1.43486  | WATE 40 | 0.00000 |
| 3               | 1 | WATE | H2  | -5.88641 | 1.36153   | 1.35375  | WATE 40 | 0.00000 |
| 4               | 2 | WATE | OH2 | -5.63910 | 3.16024   | -1.90934 | WATE 48 | 0.00000 |
| 5               | 2 | WATE | H1  | -6.21540 | 2.42275   | -1.68803 | WATE 48 | 0.00000 |
| 6               | 2 | WATE | H2  | -5.33688 | 3.46307   | -1.04798 | WATE 48 | 0.00000 |
| propane         |   |      |     |          |           |          |         |         |
| 1               | 1 | PROP | H11 | 5.84587  | -13.20124 | -5.74231 | PROP 1  | 0.00000 |
| 2               | 1 | PROP | H12 | 4.39756  | -12.30026 | -5.13086 | PROP 1  | 0.00000 |
| 3               | 1 | PROP | H13 | 5.38375  | -13.31011 | -3.99402 | PROP 1  | 0.00000 |
| 4               | 1 | PROP | C1  | 4.98653  | -13.24079 | -5.03210 | PROP 1  | 0.00000 |
| 5               | 1 | PROP | HB1 | 3.22882  | -14.46626 | -4.63314 | PROP 1  | 0.00000 |
| 6               | 1 | PROP | CB  | 4.09499  | -14.43506 | -5.32714 | PROP 1  | 0.00000 |
| 7               | 1 | PROP | HB2 | 3.69578  | -14.31610 | -6.35552 | PROP 1  | 0.00000 |
| 8               | 1 | PROP | C3  | 4.87207  | -15.73161 | -5.18497 | PROP 1  | 0.00000 |
| 9               | 1 | PROP | H31 | 5.26215  | -15.84964 | -4.14652 | PROP 1  | 0.00000 |
| 10              | 1 | PROP | H32 | 4.20520  | -16.59362 | -5.41642 | PROP 1  | 0.00000 |
| 11              | 1 | PROP | H33 | 5.73168  | -15.74051 | -5.89294 | PROP 1  | 0.00000 |
| 2-methylpropane |   |      |     |          |           |          |         |         |
| 1               | 1 | IBUT | C1  | -6.19373 | -6.33881  | 6.78862  | IBUT 1  | 0.00000 |
| 2               | 1 | IBUT | H11 | -6.87613 | -6.66887  | 7.60696  | IBUT 1  | 0.00000 |

|    |   |      |     |          |          |         |      |   |         |
|----|---|------|-----|----------|----------|---------|------|---|---------|
| 3  | 1 | IBUT | H12 | -6.78961 | -5.78982 | 6.02396 | IBUT | 1 | 0.00000 |
| 4  | 1 | IBUT | H13 | -5.73889 | -7.23811 | 6.31489 | IBUT | 1 | 0.00000 |
| 5  | 1 | IBUT | C2  | -4.18694 | -4.94027 | 6.21847 | IBUT | 1 | 0.00000 |
| 6  | 1 | IBUT | H21 | -4.78788 | -4.39480 | 5.45525 | IBUT | 1 | 0.00000 |
| 7  | 1 | IBUT | H22 | -3.40749 | -4.25156 | 6.62149 | IBUT | 1 | 0.00000 |
| 8  | 1 | IBUT | H23 | -3.68448 | -5.80638 | 5.73121 | IBUT | 1 | 0.00000 |
| 9  | 1 | IBUT | CB  | -5.10072 | -5.43005 | 7.33286 | IBUT | 1 | 0.00000 |
| 10 | 1 | IBUT | HB  | -5.59827 | -4.53631 | 7.77387 | IBUT | 1 | 0.00000 |
| 11 | 1 | IBUT | C3  | -4.28983 | -6.16252 | 8.39026 | IBUT | 1 | 0.00000 |
| 12 | 1 | IBUT | H31 | -4.96014 | -6.49112 | 9.21703 | IBUT | 1 | 0.00000 |
| 13 | 1 | IBUT | H32 | -3.78747 | -7.05961 | 7.95795 | IBUT | 1 | 0.00000 |
| 14 | 1 | IBUT | H33 | -3.51197 | -5.48189 | 8.80559 | IBUT | 1 | 0.00000 |

2,2-dimethylpropane

|    |   |      |     |          |          |         |      |   |         |
|----|---|------|-----|----------|----------|---------|------|---|---------|
| 1  | 1 | NPNT | C1  | -6.95571 | -6.49691 | 6.95802 | NPNT | 1 | 0.00000 |
| 2  | 1 | NPNT | H11 | -7.49476 | -7.05959 | 7.75584 | NPNT | 1 | 0.00000 |
| 3  | 1 | NPNT | H12 | -7.68711 | -5.86038 | 6.40990 | NPNT | 1 | 0.00000 |
| 4  | 1 | NPNT | H13 | -6.50529 | -7.22533 | 6.24595 | NPNT | 1 | 0.00000 |
| 5  | 1 | NPNT | C2  | -5.13556 | -4.85860 | 6.45104 | NPNT | 1 | 0.00000 |
| 6  | 1 | NPNT | H21 | -5.86082 | -4.21655 | 5.90121 | NPNT | 1 | 0.00000 |
| 7  | 1 | NPNT | H22 | -4.33149 | -4.21235 | 6.87475 | NPNT | 1 | 0.00000 |
| 8  | 1 | NPNT | H23 | -4.67783 | -5.58045 | 5.73694 | NPNT | 1 | 0.00000 |
| 9  | 1 | NPNT | CB  | -5.86041 | -5.61960 | 7.55746 | NPNT | 1 | 0.00000 |
| 10 | 1 | NPNT | C3  | -4.85946 | -6.50250 | 8.29798 | NPNT | 1 | 0.00000 |
| 11 | 1 | NPNT | H31 | -5.37910 | -7.05682 | 9.11235 | NPNT | 1 | 0.00000 |
| 12 | 1 | NPNT | H32 | -4.39041 | -7.23845 | 7.60372 | NPNT | 1 | 0.00000 |
| 13 | 1 | NPNT | H33 | -4.05963 | -5.86917 | 8.74483 | NPNT | 1 | 0.00000 |
| 14 | 1 | NPNT | C4  | -6.49086 | -4.62045 | 8.52276 | NPNT | 1 | 0.00000 |
| 15 | 1 | NPNT | H41 | -7.22538 | -3.96755 | 7.99555 | NPNT | 1 | 0.00000 |
| 16 | 1 | NPNT | H42 | -5.69704 | -3.98015 | 8.97047 | NPNT | 1 | 0.00000 |
| 17 | 1 | NPNT | H43 | -7.01655 | -5.16784 | 9.33800 | NPNT | 1 | 0.00000 |

1,3,5-trifluorohexane

|    |   |      |     |           |         |           |      |   |         |
|----|---|------|-----|-----------|---------|-----------|------|---|---------|
| 1  | 1 | HEXF | C1  | -14.75975 | 2.45496 | -5.35362  | HEXF | 1 | 0.00000 |
| 2  | 1 | HEXF | F1  | -14.14446 | 2.25906 | -4.13255  | HEXF | 1 | 0.00000 |
| 3  | 1 | HEXF | H12 | -15.18177 | 3.49803 | -5.38137  | HEXF | 1 | 0.00000 |
| 4  | 1 | HEXF | H13 | -15.60754 | 1.72049 | -5.44834  | HEXF | 1 | 0.00000 |
| 5  | 1 | HEXF | C2  | -13.77653 | 2.26548 | -6.50373  | HEXF | 1 | 0.00000 |
| 6  | 1 | HEXF | H21 | -12.92971 | 2.98998 | -6.39640  | HEXF | 1 | 0.00000 |
| 7  | 1 | HEXF | H22 | -13.35318 | 1.23155 | -6.46789  | HEXF | 1 | 0.00000 |
| 8  | 1 | HEXF | H31 | -15.43442 | 1.89166 | -7.84748  | HEXF | 1 | 0.00000 |
| 9  | 1 | HEXF | C3  | -14.48331 | 2.48135 | -7.85031  | HEXF | 1 | 0.00000 |
| 10 | 1 | HEXF | F2  | -14.82291 | 3.83283 | -7.98621  | HEXF | 1 | 0.00000 |
| 11 | 1 | HEXF | H41 | -13.23724 | 0.97249 | -8.79783  | HEXF | 1 | 0.00000 |
| 12 | 1 | HEXF | C4  | -13.60188 | 2.00954 | -9.00686  | HEXF | 1 | 0.00000 |
| 13 | 1 | HEXF | H42 | -12.72068 | 2.69230 | -9.08831  | HEXF | 1 | 0.00000 |
| 14 | 1 | HEXF | C5  | -14.36685 | 2.02342 | -10.33332 | HEXF | 1 | 0.00000 |
| 15 | 1 | HEXF | F3  | -15.33029 | 1.02266 | -10.36278 | HEXF | 1 | 0.00000 |
| 16 | 1 | HEXF | H52 | -14.90257 | 3.01462 | -10.43042 | HEXF | 1 | 0.00000 |
| 17 | 1 | HEXF | C6  | -13.38883 | 1.86386 | -11.49373 | HEXF | 1 | 0.00000 |
| 18 | 1 | HEXF | H61 | -12.80099 | 0.92251 | -11.38108 | HEXF | 1 | 0.00000 |
| 19 | 1 | HEXF | H62 | -13.94886 | 1.81983 | -12.45786 | HEXF | 1 | 0.00000 |
| 20 | 1 | HEXF | H63 | -12.68960 | 2.73188 | -11.51609 | HEXF | 1 | 0.00000 |

Ala-Gly-Leu-Phe-Ser extended linear conformation. The C-terminal is capped by the peptide unit -CONH(CH<sub>3</sub>); and the N-terminal is capped by -NHCOCH<sub>3</sub>.

|    |   |     |      |          |          |          |      |   |         |
|----|---|-----|------|----------|----------|----------|------|---|---------|
| 1  | 1 | ALA | CAY  | -2.14580 | 0.53881  | 0.65149  | PEP5 | 1 | 0.00000 |
| 2  | 1 | ALA | HY1  | -2.63346 | 0.72964  | 1.63825  | PEP5 | 1 | 0.00000 |
| 3  | 1 | ALA | HY2  | -2.31377 | 1.41878  | -0.01455 | PEP5 | 1 | 0.00000 |
| 4  | 1 | ALA | HY3  | -2.60784 | -0.36453 | 0.18562  | PEP5 | 1 | 0.00000 |
| 5  | 1 | ALA | CY   | -0.66812 | 0.32266  | 0.88140  | PEP5 | 1 | 0.00000 |
| 6  | 1 | ALA | OY   | -0.17376 | 0.38296  | 2.02500  | PEP5 | 1 | 0.00000 |
| 7  | 1 | ALA | N    | 0.09100  | 0.01759  | -0.22858 | PEP5 | 1 | 0.00000 |
| 8  | 1 | ALA | HN   | -0.29661 | 0.10935  | -1.13566 | PEP5 | 1 | 0.00000 |
| 9  | 1 | ALA | CA   | 1.54648  | -0.09046 | -0.15925 | PEP5 | 1 | 0.00000 |
| 10 | 1 | ALA | HA   | 1.73848  | -0.81589 | 0.68002  | PEP5 | 1 | 0.00000 |
| 11 | 1 | ALA | CB   | 2.26439  | 1.22433  | 0.17515  | PEP5 | 1 | 0.00000 |
| 12 | 1 | ALA | HB1  | 3.35631  | 1.04329  | 0.31305  | PEP5 | 1 | 0.00000 |
| 13 | 1 | ALA | HB2  | 2.11298  | 1.96757  | -0.64008 | PEP5 | 1 | 0.00000 |
| 14 | 1 | ALA | HB3  | 1.84836  | 1.63237  | 1.12767  | PEP5 | 1 | 0.00000 |
| 15 | 1 | ALA | C    | 2.13595  | -0.65437 | -1.48541 | PEP5 | 1 | 0.00000 |
| 16 | 1 | ALA | O    | 1.54513  | -0.54037 | -2.57430 | PEP5 | 1 | 0.00000 |
| 17 | 2 | GLY | N    | 3.30887  | -1.35320 | -1.34123 | PEP5 | 2 | 0.00000 |
| 18 | 2 | GLY | HN   | 3.84229  | -1.26502 | -0.50868 | PEP5 | 2 | 0.00000 |
| 19 | 2 | GLY | CA   | 4.00533  | -1.85009 | -2.52050 | PEP5 | 2 | 0.00000 |
| 20 | 2 | GLY | HA1  | 3.85019  | -2.95993 | -2.49123 | PEP5 | 2 | 0.00000 |
| 21 | 2 | GLY | HA2  | 3.55062  | -1.43543 | -3.45188 | PEP5 | 2 | 0.00000 |
| 22 | 2 | GLY | C    | 5.51930  | -1.53844 | -2.51969 | PEP5 | 2 | 0.00000 |
| 23 | 2 | GLY | O    | 6.10725  | -1.14258 | -1.49821 | PEP5 | 2 | 0.00000 |
| 24 | 3 | LEU | N    | 6.17040  | -1.86824 | -3.68569 | PEP5 | 3 | 0.00000 |
| 25 | 3 | LEU | HN   | 5.64440  | -1.98010 | -4.52049 | PEP5 | 3 | 0.00000 |
| 26 | 3 | LEU | CA   | 7.58710  | -1.55354 | -3.88216 | PEP5 | 3 | 0.00000 |
| 27 | 3 | LEU | HA   | 8.10509  | -2.00010 | -2.99286 | PEP5 | 3 | 0.00000 |
| 28 | 3 | LEU | CB   | 7.88671  | -0.03729 | -3.92407 | PEP5 | 3 | 0.00000 |
| 29 | 3 | LEU | HB1  | 7.62780  | 0.35047  | -4.94285 | PEP5 | 3 | 0.00000 |
| 30 | 3 | LEU | HB2  | 7.20416  | 0.46765  | -3.18890 | PEP5 | 3 | 0.00000 |
| 31 | 3 | LEU | CG   | 9.31791  | 0.35050  | -3.57643 | PEP5 | 3 | 0.00000 |
| 32 | 3 | LEU | HG   | 10.03649 | -0.32178 | -4.12198 | PEP5 | 3 | 0.00000 |
| 33 | 3 | LEU | CD1  | 9.56815  | 1.77282  | -4.04443 | PEP5 | 3 | 0.00000 |
| 34 | 3 | LEU | HD11 | 10.61797 | 2.07446  | -3.81289 | PEP5 | 3 | 0.00000 |
| 35 | 3 | LEU | HD12 | 9.41082  | 1.85777  | -5.14628 | PEP5 | 3 | 0.00000 |
| 36 | 3 | LEU | HD13 | 8.87434  | 2.47990  | -3.52961 | PEP5 | 3 | 0.00000 |
| 37 | 3 | LEU | CD2  | 9.59584  | 0.24508  | -2.09082 | PEP5 | 3 | 0.00000 |
| 38 | 3 | LEU | HD21 | 10.57997 | 0.71682  | -1.85193 | PEP5 | 3 | 0.00000 |
| 39 | 3 | LEU | HD22 | 8.80108  | 0.76307  | -1.50161 | PEP5 | 3 | 0.00000 |
| 40 | 3 | LEU | HD23 | 9.63550  | -0.82054 | -1.76376 | PEP5 | 3 | 0.00000 |
| 41 | 3 | LEU | C    | 8.08386  | -2.22329 | -5.20988 | PEP5 | 3 | 0.00000 |
| 42 | 3 | LEU | O    | 7.39765  | -2.14258 | -6.24448 | PEP5 | 3 | 0.00000 |
| 43 | 4 | PHE | N    | 9.29637  | -2.85767 | -5.11343 | PEP5 | 4 | 0.00000 |
| 44 | 4 | PHE | HN   | 9.72777  | -2.93901 | -4.22148 | PEP5 | 4 | 0.00000 |
| 45 | 4 | PHE | CA   | 9.78970  | -3.81353 | -6.10371 | PEP5 | 4 | 0.00000 |
| 46 | 4 | PHE | HA   | 9.52350  | -3.36923 | -7.10290 | PEP5 | 4 | 0.00000 |
| 47 | 4 | PHE | CB   | 9.09353  | -5.19966 | -5.99819 | PEP5 | 4 | 0.00000 |
| 48 | 4 | PHE | HB1  | 9.47103  | -5.71774 | -5.07850 | PEP5 | 4 | 0.00000 |
| 49 | 4 | PHE | HB2  | 7.99480  | -5.01128 | -5.85749 | PEP5 | 4 | 0.00000 |
| 50 | 4 | PHE | CG   | 9.27046  | -6.07102 | -7.19276 | PEP5 | 4 | 0.00000 |
| 51 | 4 | PHE | CD1  | 10.16020 | -7.15198 | -7.14924 | PEP5 | 4 | 0.00000 |
| 52 | 4 | PHE | HD1  | 10.74296 | -7.34401 | -6.23572 | PEP5 | 4 | 0.00000 |
| 53 | 4 | PHE | CD2  | 8.51801  | -5.85202 | -8.35418 | PEP5 | 4 | 0.00000 |
| 54 | 4 | PHE | HD2  | 7.80328  | -5.01535 | -8.39050 | PEP5 | 4 | 0.00000 |

|    |   |     |     |          |          |           |      |   |         |
|----|---|-----|-----|----------|----------|-----------|------|---|---------|
| 55 | 4 | PHE | CE1 | 10.31247 | -7.98438 | -8.25633  | PEP5 | 4 | 0.00000 |
| 56 | 4 | PHE | HE1 | 11.01407 | -8.83027 | -8.21227  | PEP5 | 4 | 0.00000 |
| 57 | 4 | PHE | CE2 | 8.67265  | -6.68553 | -9.45990  | PEP5 | 4 | 0.00000 |
| 58 | 4 | PHE | HE2 | 8.08015  | -6.50434 | -10.36896 | PEP5 | 4 | 0.00000 |
| 59 | 4 | PHE | CZ  | 9.57436  | -7.74890 | -9.41573  | PEP5 | 4 | 0.00000 |
| 60 | 4 | PHE | HZ  | 9.70178  | -8.40104 | -10.29192 | PEP5 | 4 | 0.00000 |
| 61 | 4 | PHE | C   | 11.33802 | -3.98839 | -5.98027  | PEP5 | 4 | 0.00000 |
| 62 | 4 | PHE | O   | 11.91362 | -4.12210 | -4.88222  | PEP5 | 4 | 0.00000 |
| 63 | 5 | SER | N   | 12.02934 | -3.96493 | -7.16269  | PEP5 | 5 | 0.00000 |
| 64 | 5 | SER | HN  | 11.55441 | -3.88862 | -8.03629  | PEP5 | 5 | 0.00000 |
| 65 | 5 | SER | CA  | 13.45868 | -4.14215 | -7.20233  | PEP5 | 5 | 0.00000 |
| 66 | 5 | SER | HA  | 13.92079 | -3.37378 | -6.50689  | PEP5 | 5 | 0.00000 |
| 67 | 5 | SER | CB  | 13.92852 | -5.54092 | -6.72122  | PEP5 | 5 | 0.00000 |
| 68 | 5 | SER | HB1 | 13.24576 | -5.93015 | -5.91985  | PEP5 | 5 | 0.00000 |
| 69 | 5 | SER | HB2 | 13.96980 | -6.26964 | -7.57326  | PEP5 | 5 | 0.00000 |
| 70 | 5 | SER | OG  | 15.25528 | -5.45192 | -6.24268  | PEP5 | 5 | 0.00000 |
| 71 | 5 | SER | HG1 | 15.21989 | -5.02438 | -5.37730  | PEP5 | 5 | 0.00000 |
| 72 | 5 | SER | C   | 14.01016 | -3.90110 | -8.62783  | PEP5 | 5 | 0.00000 |
| 73 | 5 | SER | O   | 13.25645 | -3.67350 | -9.59657  | PEP5 | 5 | 0.00000 |
| 74 | 5 | SER | NT  | 15.37957 | -3.92374 | -8.75028  | PEP5 | 5 | 0.00000 |
| 75 | 5 | SER | HNT | 15.91780 | -4.25615 | -7.97987  | PEP5 | 5 | 0.00000 |
| 76 | 5 | SER | CAT | 16.02532 | -3.85142 | -10.02388 | PEP5 | 5 | 0.00000 |
| 77 | 5 | SER | HT1 | 16.93100 | -3.19389 | -9.93656  | PEP5 | 5 | 0.00000 |
| 78 | 5 | SER | HT2 | 16.34870 | -4.87193 | -10.36724 | PEP5 | 5 | 0.00000 |
| 79 | 5 | SER | HT3 | 15.32567 | -3.41925 | -10.78857 | PEP5 | 5 | 0.00000 |

Ala-Gly-Leu-Phe-Ser beta turn conformation. The C-terminal is capped by the peptide unit -CONH(CH<sub>3</sub>); and the N-terminal is capped by -NHCOCH<sub>3</sub>.

|    |   |     |     |          |          |          |      |   |         |
|----|---|-----|-----|----------|----------|----------|------|---|---------|
| 1  | 1 | ALA | CAY | 0.78029  | 3.54076  | -8.73330 | PEP5 | 1 | 0.00000 |
| 2  | 1 | ALA | HY1 | -0.19064 | 3.81578  | -8.25411 | PEP5 | 1 | 0.00000 |
| 3  | 1 | ALA | HY2 | 1.06486  | 4.33624  | -9.46288 | PEP5 | 1 | 0.00000 |
| 4  | 1 | ALA | HY3 | 0.65658  | 2.57411  | -9.27833 | PEP5 | 1 | 0.00000 |
| 5  | 1 | ALA | CY  | 1.82809  | 3.40511  | -7.65346 | PEP5 | 1 | 0.00000 |
| 6  | 1 | ALA | OY  | 1.53126  | 3.53150  | -6.44661 | PEP5 | 1 | 0.00000 |
| 7  | 1 | ALA | N   | 3.10477  | 3.08451  | -8.06257 | PEP5 | 1 | 0.00000 |
| 8  | 1 | ALA | HN  | 3.33990  | 3.13986  | -9.02443 | PEP5 | 1 | 0.00000 |
| 9  | 1 | ALA | CA  | 4.23328  | 3.11077  | -7.13498 | PEP5 | 1 | 0.00000 |
| 10 | 1 | ALA | HA  | 3.90165  | 2.49122  | -6.25722 | PEP5 | 1 | 0.00000 |
| 11 | 1 | ALA | CB  | 4.59759  | 4.50724  | -6.61397 | PEP5 | 1 | 0.00000 |
| 12 | 1 | ALA | HB1 | 5.40380  | 4.42588  | -5.84725 | PEP5 | 1 | 0.00000 |
| 13 | 1 | ALA | HB2 | 4.94534  | 5.15671  | -7.44872 | PEP5 | 1 | 0.00000 |
| 14 | 1 | ALA | HB3 | 3.69733  | 4.96402  | -6.13880 | PEP5 | 1 | 0.00000 |
| 15 | 1 | ALA | C   | 5.50585  | 2.47869  | -7.77215 | PEP5 | 1 | 0.00000 |
| 16 | 1 | ALA | O   | 5.72634  | 2.55223  | -8.99531 | PEP5 | 1 | 0.00000 |
| 17 | 2 | GLY | N   | 6.31211  | 1.79233  | -6.89876 | PEP5 | 2 | 0.00000 |
| 18 | 2 | GLY | HN  | 6.17160  | 1.89417  | -5.91006 | PEP5 | 2 | 0.00000 |
| 19 | 2 | GLY | CA  | 7.63076  | 1.38830  | -7.36019 | PEP5 | 2 | 0.00000 |
| 20 | 2 | GLY | HA1 | 7.48536  | 0.40111  | -7.86647 | PEP5 | 2 | 0.00000 |
| 21 | 2 | GLY | HA2 | 8.04712  | 2.11374  | -8.10354 | PEP5 | 2 | 0.00000 |
| 22 | 2 | GLY | C   | 8.68591  | 1.28804  | -6.23699 | PEP5 | 2 | 0.00000 |
| 23 | 2 | GLY | O   | 9.63355  | 2.09557  | -6.20578 | PEP5 | 2 | 0.00000 |
| 24 | 3 | LEU | N   | 8.52103  | 0.26478  | -5.34493 | PEP5 | 3 | 0.00000 |
| 25 | 3 | LEU | HN  | 7.71232  | -0.30815 | -5.39035 | PEP5 | 3 | 0.00000 |
| 26 | 3 | LEU | CA  | 9.58488  | -0.19905 | -4.45575 | PEP5 | 3 | 0.00000 |
| 27 | 3 | LEU | HA  | 9.35966  | -1.29316 | -4.31402 | PEP5 | 3 | 0.00000 |
| 28 | 3 | LEU | CB  | 11.01020 | -0.07449 | -5.03579 | PEP5 | 3 | 0.00000 |
| 29 | 3 | LEU | HB1 | 10.95615 | -0.20994 | -6.14836 | PEP5 | 3 | 0.00000 |

|    |   |     |      |          |          |          |      |   |         |
|----|---|-----|------|----------|----------|----------|------|---|---------|
| 30 | 3 | LEU | HB2  | 11.38978 | 0.96559  | -4.86726 | PEP5 | 3 | 0.00000 |
| 31 | 3 | LEU | CG   | 11.99017 | -1.09258 | -4.46417 | PEP5 | 3 | 0.00000 |
| 32 | 3 | LEU | HG   | 11.71571 | -1.32296 | -3.39554 | PEP5 | 3 | 0.00000 |
| 33 | 3 | LEU | CD1  | 11.96834 | -2.38609 | -5.25293 | PEP5 | 3 | 0.00000 |
| 34 | 3 | LEU | HD11 | 12.68618 | -3.11660 | -4.80705 | PEP5 | 3 | 0.00000 |
| 35 | 3 | LEU | HD12 | 10.95042 | -2.84255 | -5.24170 | PEP5 | 3 | 0.00000 |
| 36 | 3 | LEU | HD13 | 12.26359 | -2.20478 | -6.31496 | PEP5 | 3 | 0.00000 |
| 37 | 3 | LEU | CD2  | 13.38907 | -0.50656 | -4.47349 | PEP5 | 3 | 0.00000 |
| 38 | 3 | LEU | HD21 | 14.12283 | -1.25661 | -4.09227 | PEP5 | 3 | 0.00000 |
| 39 | 3 | LEU | HD22 | 13.68511 | -0.21445 | -5.50988 | PEP5 | 3 | 0.00000 |
| 40 | 3 | LEU | HD23 | 13.43702 | 0.39906  | -3.82224 | PEP5 | 3 | 0.00000 |
| 41 | 3 | LEU | C    | 9.48814  | 0.44435  | -3.03794 | PEP5 | 3 | 0.00000 |
| 42 | 3 | LEU | O    | 9.38397  | -0.31725 | -2.06323 | PEP5 | 3 | 0.00000 |
| 43 | 4 | PHE | N    | 9.51082  | 1.81278  | -2.98709 | PEP5 | 4 | 0.00000 |
| 44 | 4 | PHE | HN   | 9.66722  | 2.32608  | -3.82181 | PEP5 | 4 | 0.00000 |
| 45 | 4 | PHE | CA   | 9.32089  | 2.62588  | -1.78644 | PEP5 | 4 | 0.00000 |
| 46 | 4 | PHE | HA   | 9.74438  | 3.62558  | -2.08506 | PEP5 | 4 | 0.00000 |
| 47 | 4 | PHE | CB   | 10.15229 | 2.12312  | -0.57222 | PEP5 | 4 | 0.00000 |
| 48 | 4 | PHE | HB1  | 9.61982  | 1.24372  | -0.12132 | PEP5 | 4 | 0.00000 |
| 49 | 4 | PHE | HB2  | 11.13630 | 1.74888  | -0.96225 | PEP5 | 4 | 0.00000 |
| 50 | 4 | PHE | CG   | 10.41203 | 3.17116  | 0.45355  | PEP5 | 4 | 0.00000 |
| 51 | 4 | PHE | CD1  | 9.65160  | 3.20778  | 1.62955  | PEP5 | 4 | 0.00000 |
| 52 | 4 | PHE | HD1  | 8.83556  | 2.48138  | 1.77079  | PEP5 | 4 | 0.00000 |
| 53 | 4 | PHE | CD2  | 11.45219 | 4.09457  | 0.28500  | PEP5 | 4 | 0.00000 |
| 54 | 4 | PHE | HD2  | 12.06498 | 4.06364  | -0.62820 | PEP5 | 4 | 0.00000 |
| 55 | 4 | PHE | CE1  | 9.91839  | 4.16007  | 2.61148  | PEP5 | 4 | 0.00000 |
| 56 | 4 | PHE | HE1  | 9.31578  | 4.18226  | 3.53128  | PEP5 | 4 | 0.00000 |
| 57 | 4 | PHE | CE2  | 11.71566 | 5.04702  | 1.26729  | PEP5 | 4 | 0.00000 |
| 58 | 4 | PHE | HE2  | 12.53185 | 5.77035  | 1.12548  | PEP5 | 4 | 0.00000 |
| 59 | 4 | PHE | CZ   | 10.94815 | 5.08271  | 2.43132  | PEP5 | 4 | 0.00000 |
| 60 | 4 | PHE | HZ   | 11.15646 | 5.83438  | 3.20614  | PEP5 | 4 | 0.00000 |
| 61 | 4 | PHE | C    | 7.80451  | 2.78257  | -1.44584 | PEP5 | 4 | 0.00000 |
| 62 | 4 | PHE | O    | 7.24285  | 2.23514  | -0.48721 | PEP5 | 4 | 0.00000 |
| 63 | 5 | SER | N    | 7.12874  | 3.69170  | -2.26754 | PEP5 | 5 | 0.00000 |
| 64 | 5 | SER | HN   | 7.51917  | 3.81738  | -3.17885 | PEP5 | 5 | 0.00000 |
| 65 | 5 | SER | CA   | 5.68485  | 3.76905  | -2.27194 | PEP5 | 5 | 0.00000 |
| 66 | 5 | SER | HA   | 5.41833  | 4.76669  | -2.74595 | PEP5 | 5 | 0.00000 |
| 67 | 5 | SER | CB   | 5.08089  | 3.75622  | -0.85164 | PEP5 | 5 | 0.00000 |
| 68 | 5 | SER | HB1  | 4.91863  | 2.70548  | -0.49230 | PEP5 | 5 | 0.00000 |
| 69 | 5 | SER | HB2  | 5.76236  | 4.28686  | -0.13391 | PEP5 | 5 | 0.00000 |
| 70 | 5 | SER | OG   | 3.83936  | 4.44337  | -0.94170 | PEP5 | 5 | 0.00000 |
| 71 | 5 | SER | HG1  | 3.53584  | 4.58008  | -0.03678 | PEP5 | 5 | 0.00000 |
| 72 | 5 | SER | C    | 5.03674  | 2.70086  | -3.19360 | PEP5 | 5 | 0.00000 |
| 73 | 5 | SER | O    | 5.72287  | 2.14820  | -4.08965 | PEP5 | 5 | 0.00000 |
| 74 | 5 | SER | NT   | 3.70833  | 2.43309  | -3.03738 | PEP5 | 5 | 0.00000 |
| 75 | 5 | SER | HNT  | 3.18781  | 2.95005  | -2.36260 | PEP5 | 5 | 0.00000 |
| 76 | 5 | SER | CAT  | 2.99519  | 1.46986  | -3.81829 | PEP5 | 5 | 0.00000 |
| 77 | 5 | SER | HT1  | 2.46657  | 0.75295  | -3.13344 | PEP5 | 5 | 0.00000 |
| 78 | 5 | SER | HT2  | 2.23607  | 1.98620  | -4.46807 | PEP5 | 5 | 0.00000 |
| 79 | 5 | SER | HT3  | 3.70471  | 0.89133  | -4.46694 | PEP5 | 5 | 0.00000 |

Table S2. Cartesian coordinates from AM1 geometry optimizations for all compounds described in the main paper. Coordinates are given in angstroms in CHARMM format.

|                     |   |      |     |          |           |          |         |         |
|---------------------|---|------|-----|----------|-----------|----------|---------|---------|
| water dimer         |   |      |     |          |           |          |         |         |
| 1                   | 1 | WATE | OH2 | -6.05189 | 1.92824   | 0.65797  | WATE 40 | 0.00000 |
| 2                   | 1 | WATE | H1  | -6.79495 | 2.54132   | 0.68802  | WATE 40 | 0.00000 |
| 3                   | 1 | WATE | H2  | -6.10268 | 1.45695   | 1.49335  | WATE 40 | 0.00000 |
| 4                   | 2 | WATE | OH2 | -6.09087 | 3.23186   | -1.40355 | WATE 48 | 0.00000 |
| 5                   | 2 | WATE | H1  | -6.16349 | 2.28154   | -1.53829 | WATE 48 | 0.00000 |
| 6                   | 2 | WATE | H2  | -5.27795 | 3.32324   | -0.89627 | WATE 48 | 0.00000 |
| propane             |   |      |     |          |           |          |         |         |
| 1                   | 1 | PROP | H11 | 5.84338  | -13.19156 | -5.73133 | PROP 1  | 0.00000 |
| 2                   | 1 | PROP | H12 | 4.39381  | -12.29097 | -5.13165 | PROP 1  | 0.00000 |
| 3                   | 1 | PROP | H13 | 5.37850  | -13.28696 | -3.98697 | PROP 1  | 0.00000 |
| 4                   | 1 | PROP | C1  | 4.98159  | -13.23136 | -5.02644 | PROP 1  | 0.00000 |
| 5                   | 1 | PROP | HB1 | 3.23877  | -14.44172 | -4.62260 | PROP 1  | 0.00000 |
| 6                   | 1 | PROP | CB  | 4.10815  | -14.43409 | -5.32499 | PROP 1  | 0.00000 |
| 7                   | 1 | PROP | HB2 | 3.70253  | -14.34655 | -6.36280 | PROP 1  | 0.00000 |
| 8                   | 1 | PROP | C3  | 4.86843  | -15.73920 | -5.19375 | PROP 1  | 0.00000 |
| 9                   | 1 | PROP | H31 | 5.26251  | -15.85771 | -4.15848 | PROP 1  | 0.00000 |
| 10                  | 1 | PROP | H32 | 4.19934  | -16.60082 | -5.41919 | PROP 1  | 0.00000 |
| 11                  | 1 | PROP | H33 | 5.72738  | -15.76231 | -5.90284 | PROP 1  | 0.00000 |
| 2-methylpropane     |   |      |     |          |           |          |         |         |
| 1                   | 1 | IBUT | C1  | -6.19415 | -6.33873  | 6.77907  | IBUT 1  | 0.00000 |
| 2                   | 1 | IBUT | H11 | -6.86969 | -6.66901  | 7.60064  | IBUT 1  | 0.00000 |
| 3                   | 1 | IBUT | H12 | -6.79742 | -5.79236  | 6.01884  | IBUT 1  | 0.00000 |
| 4                   | 1 | IBUT | H13 | -5.75054 | -7.24080  | 6.29940  | IBUT 1  | 0.00000 |
| 5                   | 1 | IBUT | C2  | -4.19036 | -4.94228  | 6.20978  | IBUT 1  | 0.00000 |
| 6                   | 1 | IBUT | H21 | -4.78531 | -4.39011  | 5.44718  | IBUT 1  | 0.00000 |
| 7                   | 1 | IBUT | H22 | -3.41144 | -4.25894  | 6.61812  | IBUT 1  | 0.00000 |
| 8                   | 1 | IBUT | H23 | -3.68448 | -5.80094  | 5.71242  | IBUT 1  | 0.00000 |
| 9                   | 1 | IBUT | CB  | -5.09702 | -5.43694  | 7.32898  | IBUT 1  | 0.00000 |
| 10                  | 1 | IBUT | HB  | -5.58479 | -4.54447  | 7.80131  | IBUT 1  | 0.00000 |
| 11                  | 1 | IBUT | C3  | -4.29050 | -6.15698  | 8.40154  | IBUT 1  | 0.00000 |
| 12                  | 1 | IBUT | H31 | -4.95813 | -6.48650  | 9.22984  | IBUT 1  | 0.00000 |
| 13                  | 1 | IBUT | H32 | -3.78773 | -7.05339  | 7.97230  | IBUT 1  | 0.00000 |
| 14                  | 1 | IBUT | H33 | -3.51199 | -5.47868  | 8.81898  | IBUT 1  | 0.00000 |
| 2,2-dimethylpropane |   |      |     |          |           |          |         |         |
| 1                   | 1 | NPNT | C1  | -6.95486 | -6.49531  | 6.95038  | NPNT 1  | 0.00000 |
| 2                   | 1 | NPNT | H11 | -7.48928 | -7.05456  | 7.75154  | NPNT 1  | 0.00000 |
| 3                   | 1 | NPNT | H12 | -7.69183 | -5.86583  | 6.40188  | NPNT 1  | 0.00000 |
| 4                   | 1 | NPNT | H13 | -6.51130 | -7.22794  | 6.23854  | NPNT 1  | 0.00000 |
| 5                   | 1 | NPNT | C2  | -5.13939 | -4.86121  | 6.44471  | NPNT 1  | 0.00000 |
| 6                   | 1 | NPNT | H21 | -5.85771 | -4.21495  | 5.89102  | NPNT 1  | 0.00000 |
| 7                   | 1 | NPNT | H22 | -4.33788 | -4.21800  | 6.87377  | NPNT 1  | 0.00000 |
| 8                   | 1 | NPNT | H23 | -4.67718 | -5.57706  | 5.72768  | NPNT 1  | 0.00000 |
| 9                   | 1 | NPNT | CB  | -5.86044 | -5.61957  | 7.55746  | NPNT 1  | 0.00000 |
| 10                  | 1 | NPNT | C3  | -4.86024 | -6.49951  | 8.30481  | NPNT 1  | 0.00000 |
| 11                  | 1 | NPNT | H31 | -5.37315 | -7.05880  | 9.11988  | NPNT 1  | 0.00000 |
| 12                  | 1 | NPNT | H32 | -4.39517 | -7.23219  | 7.60688  | NPNT 1  | 0.00000 |
| 13                  | 1 | NPNT | H33 | -4.05587 | -5.87313  | 8.75297  | NPNT 1  | 0.00000 |
| 14                  | 1 | NPNT | C4  | -6.48725 | -4.62225  | 8.52992  | NPNT 1  | 0.00000 |
| 15                  | 1 | NPNT | H41 | -7.21941 | -3.97354  | 7.99764  | NPNT 1  | 0.00000 |

|    |   |      |     |          |          |         |      |   |         |
|----|---|------|-----|----------|----------|---------|------|---|---------|
| 16 | 1 | NPNT | H42 | -5.69959 | -3.97659 | 8.98039 | NPNT | 1 | 0.00000 |
| 17 | 1 | NPNT | H43 | -7.01687 | -5.16226 | 9.34730 | NPNT | 1 | 0.00000 |

Ala-Gly-Leu-Phe-Ser extended linear conformation. The C-terminal is capped by the peptide unit -CONH(CH<sub>3</sub>); and the N-terminal is capped by -NHCOCH<sub>3</sub>.

|    |   |     |      |          |          |          |      |   |         |
|----|---|-----|------|----------|----------|----------|------|---|---------|
| 1  | 1 | ALA | CAY  | -2.02562 | -0.03633 | 0.26618  | PEP5 | 1 | 0.00000 |
| 2  | 1 | ALA | HY1  | -2.65828 | -0.67539 | 0.92925  | PEP5 | 1 | 0.00000 |
| 3  | 1 | ALA | HY2  | -2.22503 | 1.03743  | 0.49811  | PEP5 | 1 | 0.00000 |
| 4  | 1 | ALA | HY3  | -2.29540 | -0.23784 | -0.79867 | PEP5 | 1 | 0.00000 |
| 5  | 1 | ALA | CY   | -0.57598 | -0.37583 | 0.50818  | PEP5 | 1 | 0.00000 |
| 6  | 1 | ALA | OY   | -0.23679 | -1.28495 | 1.29104  | PEP5 | 1 | 0.00000 |
| 7  | 1 | ALA | N    | 0.36973  | 0.39770  | -0.14754 | PEP5 | 1 | 0.00000 |
| 8  | 1 | ALA | HN   | 0.07670  | 1.00930  | -0.87454 | PEP5 | 1 | 0.00000 |
| 9  | 1 | ALA | CA   | 1.77386  | 0.08172  | -0.11285 | PEP5 | 1 | 0.00000 |
| 10 | 1 | ALA | HA   | 1.91963  | -0.75767 | 0.63519  | PEP5 | 1 | 0.00000 |
| 11 | 1 | ALA | CB   | 2.64678  | 1.26717  | 0.30592  | PEP5 | 1 | 0.00000 |
| 12 | 1 | ALA | HB1  | 3.71194  | 0.93616  | 0.35091  | PEP5 | 1 | 0.00000 |
| 13 | 1 | ALA | HB2  | 2.55939  | 2.10563  | -0.42615 | PEP5 | 1 | 0.00000 |
| 14 | 1 | ALA | HB3  | 2.34165  | 1.63532  | 1.31436  | PEP5 | 1 | 0.00000 |
| 15 | 1 | ALA | C    | 2.27842  | -0.35341 | -1.51376 | PEP5 | 1 | 0.00000 |
| 16 | 1 | ALA | O    | 1.88601  | 0.22134  | -2.54865 | PEP5 | 1 | 0.00000 |
| 17 | 2 | GLY | N    | 3.15553  | -1.41883 | -1.56344 | PEP5 | 2 | 0.00000 |
| 18 | 2 | GLY | HN   | 3.55745  | -1.75726 | -0.71712 | PEP5 | 2 | 0.00000 |
| 19 | 2 | GLY | CA   | 3.82600  | -1.79156 | -2.77283 | PEP5 | 2 | 0.00000 |
| 20 | 2 | GLY | HA1  | 3.60638  | -2.87824 | -2.99125 | PEP5 | 2 | 0.00000 |
| 21 | 2 | GLY | HA2  | 3.43131  | -1.16644 | -3.62489 | PEP5 | 2 | 0.00000 |
| 22 | 2 | GLY | C    | 5.35806  | -1.68545 | -2.65888 | PEP5 | 2 | 0.00000 |
| 23 | 2 | GLY | O    | 5.94317  | -1.92676 | -1.58281 | PEP5 | 2 | 0.00000 |
| 24 | 3 | LEU | N    | 6.04601  | -1.34003 | -3.79893 | PEP5 | 3 | 0.00000 |
| 25 | 3 | LEU | HN   | 5.55940  | -1.16493 | -4.64755 | PEP5 | 3 | 0.00000 |
| 26 | 3 | LEU | CA   | 7.48717  | -1.31636 | -3.86204 | PEP5 | 3 | 0.00000 |
| 27 | 3 | LEU | HA   | 7.88039  | -1.71181 | -2.87596 | PEP5 | 3 | 0.00000 |
| 28 | 3 | LEU | CB   | 8.05344  | 0.09639  | -4.08797 | PEP5 | 3 | 0.00000 |
| 29 | 3 | LEU | HB1  | 7.82884  | 0.41434  | -5.14092 | PEP5 | 3 | 0.00000 |
| 30 | 3 | LEU | HB2  | 7.53743  | 0.81480  | -3.39742 | PEP5 | 3 | 0.00000 |
| 31 | 3 | LEU | CG   | 9.55361  | 0.17256  | -3.84539 | PEP5 | 3 | 0.00000 |
| 32 | 3 | LEU | HG   | 10.06314 | -0.64993 | -4.42436 | PEP5 | 3 | 0.00000 |
| 33 | 3 | LEU | CD1  | 10.07460 | 1.50260  | -4.35578 | PEP5 | 3 | 0.00000 |
| 34 | 3 | LEU | HD11 | 11.18003 | 1.56327  | -4.21140 | PEP5 | 3 | 0.00000 |
| 35 | 3 | LEU | HD12 | 9.85173  | 1.61956  | -5.44347 | PEP5 | 3 | 0.00000 |
| 36 | 3 | LEU | HD13 | 9.59790  | 2.34743  | -3.80275 | PEP5 | 3 | 0.00000 |
| 37 | 3 | LEU | CD2  | 9.89853  | 0.01008  | -2.37946 | PEP5 | 3 | 0.00000 |
| 38 | 3 | LEU | HD21 | 10.99183 | 0.17830  | -2.22344 | PEP5 | 3 | 0.00000 |
| 39 | 3 | LEU | HD22 | 9.33448  | 0.74517  | -1.75646 | PEP5 | 3 | 0.00000 |
| 40 | 3 | LEU | HD23 | 9.65190  | -1.01889 | -2.02302 | PEP5 | 3 | 0.00000 |
| 41 | 3 | LEU | C    | 7.96091  | -2.20523 | -5.04219 | PEP5 | 3 | 0.00000 |
| 42 | 3 | LEU | O    | 7.44857  | -2.09073 | -6.17335 | PEP5 | 3 | 0.00000 |
| 43 | 4 | PHE | N    | 8.92234  | -3.15815 | -4.76812 | PEP5 | 4 | 0.00000 |
| 44 | 4 | PHE | HN   | 9.43612  | -3.08780 | -3.91660 | PEP5 | 4 | 0.00000 |
| 45 | 4 | PHE | CA   | 9.55013  | -3.91940 | -5.82315 | PEP5 | 4 | 0.00000 |
| 46 | 4 | PHE | HA   | 9.15255  | -3.53716 | -6.81624 | PEP5 | 4 | 0.00000 |
| 47 | 4 | PHE | CB   | 9.23831  | -5.42841 | -5.71835 | PEP5 | 4 | 0.00000 |
| 48 | 4 | PHE | HB1  | 9.96625  | -5.91305 | -5.01616 | PEP5 | 4 | 0.00000 |
| 49 | 4 | PHE | HB2  | 8.21185  | -5.56879 | -5.28045 | PEP5 | 4 | 0.00000 |
| 50 | 4 | PHE | CG   | 9.27019  | -6.08980 | -7.05101 | PEP5 | 4 | 0.00000 |
| 51 | 4 | PHE | CD1  | 10.19138 | -7.10971 | -7.31470 | PEP5 | 4 | 0.00000 |

|    |   |     |     |          |          |           |      |   |         |
|----|---|-----|-----|----------|----------|-----------|------|---|---------|
| 52 | 4 | PHE | HD1 | 10.91249 | -7.41149 | -6.54063  | PEP5 | 4 | 0.00000 |
| 53 | 4 | PHE | CD2 | 8.34895  | -5.72363 | -8.04129  | PEP5 | 4 | 0.00000 |
| 54 | 4 | PHE | HD2 | 7.61484  | -4.92826 | -7.83722  | PEP5 | 4 | 0.00000 |
| 55 | 4 | PHE | CE1 | 10.19589 | -7.75007 | -8.55344  | PEP5 | 4 | 0.00000 |
| 56 | 4 | PHE | HE1 | 10.92594 | -8.54787 | -8.75439  | PEP5 | 4 | 0.00000 |
| 57 | 4 | PHE | CE2 | 8.35841  | -6.36273 | -9.27931  | PEP5 | 4 | 0.00000 |
| 58 | 4 | PHE | HE2 | 7.63660  | -6.06467 | -10.05418 | PEP5 | 4 | 0.00000 |
| 59 | 4 | PHE | CZ  | 9.28195  | -7.37621 | -9.53774  | PEP5 | 4 | 0.00000 |
| 60 | 4 | PHE | HZ  | 9.29077  | -7.87698 | -10.51678 | PEP5 | 4 | 0.00000 |
| 61 | 4 | PHE | C   | 11.08659 | -3.72520 | -5.81392  | PEP5 | 4 | 0.00000 |
| 62 | 4 | PHE | O   | 11.67277 | -3.12144 | -4.88902  | PEP5 | 4 | 0.00000 |
| 63 | 5 | SER | N   | 11.78844 | -4.25889 | -6.86747  | PEP5 | 5 | 0.00000 |
| 64 | 5 | SER | HN  | 11.32239 | -4.74065 | -7.60699  | PEP5 | 5 | 0.00000 |
| 65 | 5 | SER | CA  | 13.20738 | -4.04400 | -6.99458  | PEP5 | 5 | 0.00000 |
| 66 | 5 | SER | HA  | 13.42375 | -2.96949 | -6.69618  | PEP5 | 5 | 0.00000 |
| 67 | 5 | SER | CB  | 14.04694 | -4.95861 | -6.06427  | PEP5 | 5 | 0.00000 |
| 68 | 5 | SER | HB1 | 13.48855 | -5.16878 | -5.11398  | PEP5 | 5 | 0.00000 |
| 69 | 5 | SER | HB2 | 14.30710 | -5.92381 | -6.57328  | PEP5 | 5 | 0.00000 |
| 70 | 5 | SER | OG  | 15.28789 | -4.34363 | -5.78279  | PEP5 | 5 | 0.00000 |
| 71 | 5 | SER | HG1 | 15.11674 | -3.61479 | -5.17254  | PEP5 | 5 | 0.00000 |
| 72 | 5 | SER | C   | 13.68892 | -4.23833 | -8.45169  | PEP5 | 5 | 0.00000 |
| 73 | 5 | SER | O   | 12.91800 | -4.60739 | -9.36029  | PEP5 | 5 | 0.00000 |
| 74 | 5 | SER | NT  | 15.01160 | -3.94126 | -8.68759  | PEP5 | 5 | 0.00000 |
| 75 | 5 | SER | HNT | 15.61298 | -3.80027 | -7.90580  | PEP5 | 5 | 0.00000 |
| 76 | 5 | SER | CAT | 15.62338 | -4.15511 | -9.96156  | PEP5 | 5 | 0.00000 |
| 77 | 5 | SER | HT1 | 16.30145 | -3.29023 | -10.19225 | PEP5 | 5 | 0.00000 |
| 78 | 5 | SER | HT2 | 16.23177 | -5.10042 | -9.96106  | PEP5 | 5 | 0.00000 |
| 79 | 5 | SER | HT3 | 14.83822 | -4.23280 | -10.76058 | PEP5 | 5 | 0.00000 |

Ala-Gly-Leu-Phe-Ser beta turn conformation. The C-terminal is capped by the peptide unit  $-\text{CONH}(\text{CH}_3)$ ; and the N-terminal is capped by  $-\text{NHCOCH}_3$ .

|    |   |     |     |          |          |          |      |   |         |
|----|---|-----|-----|----------|----------|----------|------|---|---------|
| 1  | 1 | ALA | CAY | 0.98957  | 3.28525  | -8.92608 | PEP5 | 1 | 0.00000 |
| 2  | 1 | ALA | HY1 | -0.01743 | 3.03194  | -8.51395 | PEP5 | 1 | 0.00000 |
| 3  | 1 | ALA | HY2 | 0.95375  | 4.30910  | -9.36980 | PEP5 | 1 | 0.00000 |
| 4  | 1 | ALA | HY3 | 1.25152  | 2.55045  | -9.72559 | PEP5 | 1 | 0.00000 |
| 5  | 1 | ALA | CY  | 2.00253  | 3.21220  | -7.80979 | PEP5 | 1 | 0.00000 |
| 6  | 1 | ALA | OY  | 1.69095  | 2.79946  | -6.67291 | PEP5 | 1 | 0.00000 |
| 7  | 1 | ALA | N   | 3.28143  | 3.65915  | -8.08745 | PEP5 | 1 | 0.00000 |
| 8  | 1 | ALA | HN  | 3.53441  | 3.84909  | -9.03046 | PEP5 | 1 | 0.00000 |
| 9  | 1 | ALA | CA  | 4.37236  | 3.49777  | -7.15959 | PEP5 | 1 | 0.00000 |
| 10 | 1 | ALA | HA  | 3.95432  | 3.07661  | -6.18964 | PEP5 | 1 | 0.00000 |
| 11 | 1 | ALA | CB  | 5.09199  | 4.80924  | -6.83713 | PEP5 | 1 | 0.00000 |
| 12 | 1 | ALA | HB1 | 5.84461  | 4.60726  | -6.03594 | PEP5 | 1 | 0.00000 |
| 13 | 1 | ALA | HB2 | 5.61174  | 5.21513  | -7.73744 | PEP5 | 1 | 0.00000 |
| 14 | 1 | ALA | HB3 | 4.36586  | 5.57055  | -6.46493 | PEP5 | 1 | 0.00000 |
| 15 | 1 | ALA | C   | 5.44962  | 2.54269  | -7.73606 | PEP5 | 1 | 0.00000 |
| 16 | 1 | ALA | O   | 5.74394  | 2.55189  | -8.94887 | PEP5 | 1 | 0.00000 |
| 17 | 2 | GLY | N   | 6.05018  | 1.67193  | -6.85088 | PEP5 | 2 | 0.00000 |
| 18 | 2 | GLY | HN  | 5.84864  | 1.75716  | -5.87848 | PEP5 | 2 | 0.00000 |
| 19 | 2 | GLY | CA  | 7.17842  | 0.88038  | -7.23716 | PEP5 | 2 | 0.00000 |
| 20 | 2 | GLY | HA1 | 6.83816  | -0.18235 | -7.40671 | PEP5 | 2 | 0.00000 |
| 21 | 2 | GLY | HA2 | 7.60634  | 1.26490  | -8.21124 | PEP5 | 2 | 0.00000 |
| 22 | 2 | GLY | C   | 8.31728  | 0.92834  | -6.20161 | PEP5 | 2 | 0.00000 |
| 23 | 2 | GLY | O   | 9.04074  | 1.93877  | -6.09633 | PEP5 | 2 | 0.00000 |
| 24 | 3 | LEU | N   | 8.50132  | -0.19298 | -5.42332 | PEP5 | 3 | 0.00000 |
| 25 | 3 | LEU | HN  | 7.82688  | -0.92026 | -5.47419 | PEP5 | 3 | 0.00000 |
| 26 | 3 | LEU | CA  | 9.61964  | -0.42947 | -4.54841 | PEP5 | 3 | 0.00000 |



|    |   |     |      |          |          |          |      |   |         |
|----|---|-----|------|----------|----------|----------|------|---|---------|
| 27 | 3 | LEU | HA   | 9.61782  | -1.54186 | -4.31711 | PEP5 | 3 | 0.00000 |
| 28 | 3 | LEU | CB   | 10.98791 | -0.07448 | -5.15129 | PEP5 | 3 | 0.00000 |
| 29 | 3 | LEU | HB1  | 11.04026 | -0.45873 | -6.20428 | PEP5 | 3 | 0.00000 |
| 30 | 3 | LEU | HB2  | 11.09781 | 1.04119  | -5.20394 | PEP5 | 3 | 0.00000 |
| 31 | 3 | LEU | CG   | 12.12860 | -0.67691 | -4.34200 | PEP5 | 3 | 0.00000 |
| 32 | 3 | LEU | HG   | 11.88003 | -0.58935 | -3.24450 | PEP5 | 3 | 0.00000 |
| 33 | 3 | LEU | CD1  | 12.32482 | -2.14267 | -4.67090 | PEP5 | 3 | 0.00000 |
| 34 | 3 | LEU | HD11 | 13.15700 | -2.56493 | -4.05734 | PEP5 | 3 | 0.00000 |
| 35 | 3 | LEU | HD12 | 11.39829 | -2.72577 | -4.45245 | PEP5 | 3 | 0.00000 |
| 36 | 3 | LEU | HD13 | 12.58106 | -2.27415 | -5.74982 | PEP5 | 3 | 0.00000 |
| 37 | 3 | LEU | CD2  | 13.40840 | 0.09003  | -4.60808 | PEP5 | 3 | 0.00000 |
| 38 | 3 | LEU | HD21 | 14.25247 | -0.35954 | -4.03160 | PEP5 | 3 | 0.00000 |
| 39 | 3 | LEU | HD22 | 13.66486 | 0.05920  | -5.69442 | PEP5 | 3 | 0.00000 |
| 40 | 3 | LEU | HD23 | 13.29707 | 1.15744  | -4.30049 | PEP5 | 3 | 0.00000 |
| 41 | 3 | LEU | C    | 9.47985  | 0.25489  | -3.16112 | PEP5 | 3 | 0.00000 |
| 42 | 3 | LEU | O    | 9.54416  | -0.45623 | -2.14045 | PEP5 | 3 | 0.00000 |
| 43 | 4 | PHE | N    | 9.32072  | 1.62096  | -3.12707 | PEP5 | 4 | 0.00000 |
| 44 | 4 | PHE | HN   | 9.29370  | 2.12134  | -3.98989 | PEP5 | 4 | 0.00000 |
| 45 | 4 | PHE | CA   | 9.25441  | 2.41112  | -1.92496 | PEP5 | 4 | 0.00000 |
| 46 | 4 | PHE | HA   | 9.64226  | 3.44546  | -2.18776 | PEP5 | 4 | 0.00000 |
| 47 | 4 | PHE | CB   | 10.10638 | 1.88753  | -0.75464 | PEP5 | 4 | 0.00000 |
| 48 | 4 | PHE | HB1  | 9.56636  | 1.03129  | -0.26318 | PEP5 | 4 | 0.00000 |
| 49 | 4 | PHE | HB2  | 11.07481 | 1.48153  | -1.15446 | PEP5 | 4 | 0.00000 |
| 50 | 4 | PHE | CG   | 10.39661 | 2.96701  | 0.22780  | PEP5 | 4 | 0.00000 |
| 51 | 4 | PHE | CD1  | 9.78366  | 2.95573  | 1.48632  | PEP5 | 4 | 0.00000 |
| 52 | 4 | PHE | HD1  | 9.05582  | 2.16434  | 1.72682  | PEP5 | 4 | 0.00000 |
| 53 | 4 | PHE | CD2  | 11.30750 | 3.98425  | -0.08247 | PEP5 | 4 | 0.00000 |
| 54 | 4 | PHE | HD2  | 11.79441 | 3.99809  | -1.06887 | PEP5 | 4 | 0.00000 |
| 55 | 4 | PHE | CE1  | 10.08438 | 3.94419  | 2.42251  | PEP5 | 4 | 0.00000 |
| 56 | 4 | PHE | HE1  | 9.60208  | 3.92620  | 3.41079  | PEP5 | 4 | 0.00000 |
| 57 | 4 | PHE | CE2  | 11.60344 | 4.97303  | 0.85384  | PEP5 | 4 | 0.00000 |
| 58 | 4 | PHE | HE2  | 12.31995 | 5.76856  | 0.60266  | PEP5 | 4 | 0.00000 |
| 59 | 4 | PHE | CZ   | 10.99458 | 4.95309  | 2.10887  | PEP5 | 4 | 0.00000 |
| 60 | 4 | PHE | HZ   | 11.23296 | 5.73083  | 2.84881  | PEP5 | 4 | 0.00000 |
| 61 | 4 | PHE | C    | 7.77999  | 2.55743  | -1.44545 | PEP5 | 4 | 0.00000 |
| 62 | 4 | PHE | O    | 7.32498  | 1.87671  | -0.51163 | PEP5 | 4 | 0.00000 |
| 63 | 5 | SER | N    | 7.04457  | 3.55839  | -2.07468 | PEP5 | 5 | 0.00000 |
| 64 | 5 | SER | HN   | 7.35141  | 3.81121  | -2.99178 | PEP5 | 5 | 0.00000 |
| 65 | 5 | SER | CA   | 5.62429  | 3.74908  | -1.89344 | PEP5 | 5 | 0.00000 |
| 66 | 5 | SER | HA   | 5.42921  | 4.85993  | -2.04065 | PEP5 | 5 | 0.00000 |
| 67 | 5 | SER | CB   | 5.13004  | 3.38266  | -0.48023 | PEP5 | 5 | 0.00000 |
| 68 | 5 | SER | HB1  | 4.91866  | 2.28393  | -0.39889 | PEP5 | 5 | 0.00000 |
| 69 | 5 | SER | HB2  | 5.89872  | 3.66510  | 0.28871  | PEP5 | 5 | 0.00000 |
| 70 | 5 | SER | OG   | 3.93869  | 4.13102  | -0.26774 | PEP5 | 5 | 0.00000 |
| 71 | 5 | SER | HG1  | 3.70805  | 4.01888  | 0.66140  | PEP5 | 5 | 0.00000 |
| 72 | 5 | SER | C    | 4.79878  | 3.06047  | -3.01293 | PEP5 | 5 | 0.00000 |
| 73 | 5 | SER | O    | 5.34332  | 2.79976  | -4.11430 | PEP5 | 5 | 0.00000 |
| 74 | 5 | SER | NT   | 3.47813  | 2.79159  | -2.79119 | PEP5 | 5 | 0.00000 |
| 75 | 5 | SER | HNT  | 3.05413  | 3.10731  | -1.94758 | PEP5 | 5 | 0.00000 |
| 76 | 5 | SER | CAT  | 2.62111  | 2.24830  | -3.80166 | PEP5 | 5 | 0.00000 |
| 77 | 5 | SER | HT1  | 1.87219  | 1.56574  | -3.31993 | PEP5 | 5 | 0.00000 |
| 78 | 5 | SER | HT2  | 2.07458  | 3.06353  | -4.35137 | PEP5 | 5 | 0.00000 |
| 79 | 5 | SER | HT3  | 3.22128  | 1.66701  | -4.55191 | PEP5 | 5 | 0.00000 |
